# Supplementary material for: PD-1 and PD-L1 expression in 132 recurrent nasopharyngeal carcinoma: the correlation with anemia and outcomes
Source: PubMed Central journal article supplement (PMC5584243; doi:10.18632/oncotarget.17214), 2017-04-19
Supplement: oncotarget-08-51210-s001.pdf [file oncotarget-08-51210-s001.pdf]

## PD-1 and PD-L1 expression in 132 recurrent nasopharyngeal carcinoma: the correlation with anemia and outcomes

### SUPPLEMENTARY MATERIALS

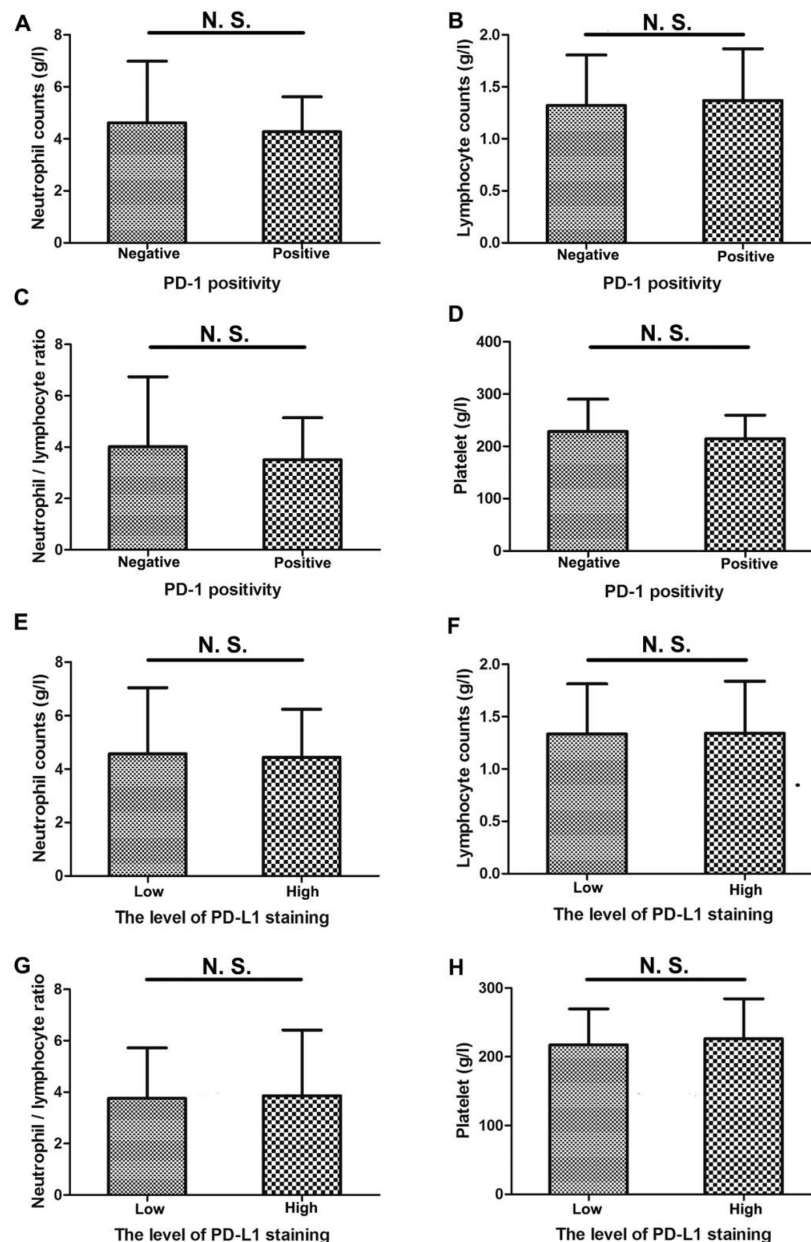

**Supplementary Figure 1: Potential peripheral blood biomarkers in recurrent NPC patients with different PD-1 / PD-L1 level.** (A-D) Statistical analysis suggested no significance (N. S.) between PD-1 positivity and pre-retreatment neutrophil counts (A), lymphocyte counts (B), neutrophil / lymphocyte ratio (C) as well as platelet (D) in the 132 patients with recurrent NPC. (E-H) Statistical analysis suggested no significance (N. S.) between PD-L1 level and neutrophil counts (E), lymphocyte counts (F), neutrophil / lymphocyte ratio (G) as well as platelet (H) in this cohort of recurrent patients either. T-test was used to evaluate the association of PD-1 positivity with neutrophil counts and platelet after normality tests and homogeneity of variance test. Nonparametric Mann-Whitney U test was applied to evaluate the association of PD-1 positivity with lymphocyte count and neutrophil / lymphocyte ratio.

**Supplementary Table 1: Primary and second antibodies used for immunohistochemistry (IHC) and immunofluorescence (IF) staining**

| <b>Antigens</b>                        | <b>Species antibodies raised in</b> | <b>Methods</b> | <b>Dilution</b> | <b>Suppliers</b>                            |
|----------------------------------------|-------------------------------------|----------------|-----------------|---------------------------------------------|
| <b>PD-1, human</b>                     | mouse, monoclonal                   | IHC            | 1:100           | Abcam, UK, Cat. #ab52587                    |
| <b>PD-L1, human</b>                    | rabbit, monoclonal                  | IHC            | 1:100           | Cell Signaling Technology, USA, Cat. #13684 |
| <b>PD-L1, human</b>                    | rabbit, monoclonal                  | IF             | 1:250           | Abcam, UK, Cat. #ab213524                   |
| <b>HIF-1<math>\alpha</math>, human</b> | mouse, monoclonal                   | IF             | 1:200           | Abcam, UK, Cat. #ab113642                   |

**Supplementary Table 2: Second antibodies and counterstaining of nuclei used for immunofluorescence (IF) staining**

| <b>Secondary detection system used</b>                                           | <b>Host</b> | <b>Method</b> | <b>Dilution</b> | <b>Supplier</b>                            |
|----------------------------------------------------------------------------------|-------------|---------------|-----------------|--------------------------------------------|
| Anti-rabbit IgG (H+L), F(ab') <sub>2</sub> Fragment (Alexa Fluor® 555 Conjugate) | goat        | IF            | 1:50            | Cell Signaling Technology, USA, Cat. #4413 |
| Anti-mouse IgG (H+L) F(ab') <sub>2</sub> Fragment (Alexa Fluor® 488 Conjugate)   | goat        | IF            | 1:50            | Cell Signaling Technology, USA, Cat. #4407 |
| DAPI (nucleic acid staining)                                                     | -           | IF            | 2µg/ml          | Sigma, USA, Cat. #D9542                    |
